# Supplementary material
Source: HighWire-hosted journal article supplement (http://dmd.aspetjournals.org/highwire/filestream/66455/field_highwire_adjunct_files/0/Figure_S1_revised_59451.pdf)
Supplement: Figure_S1_revised_59451.pdf [file Figure_S1_revised_59451.pdf]

## Identification of Diet-Derived Constituents as Potent Inhibitors of Intestinal Glucuronidation

## Drug Metabolism and Disposition

Brandon T. Gufford, Gang Chen, Philip Lazarus, Tyler N. Graf, Nicholas H. Oberlies, and Mary F. Paine

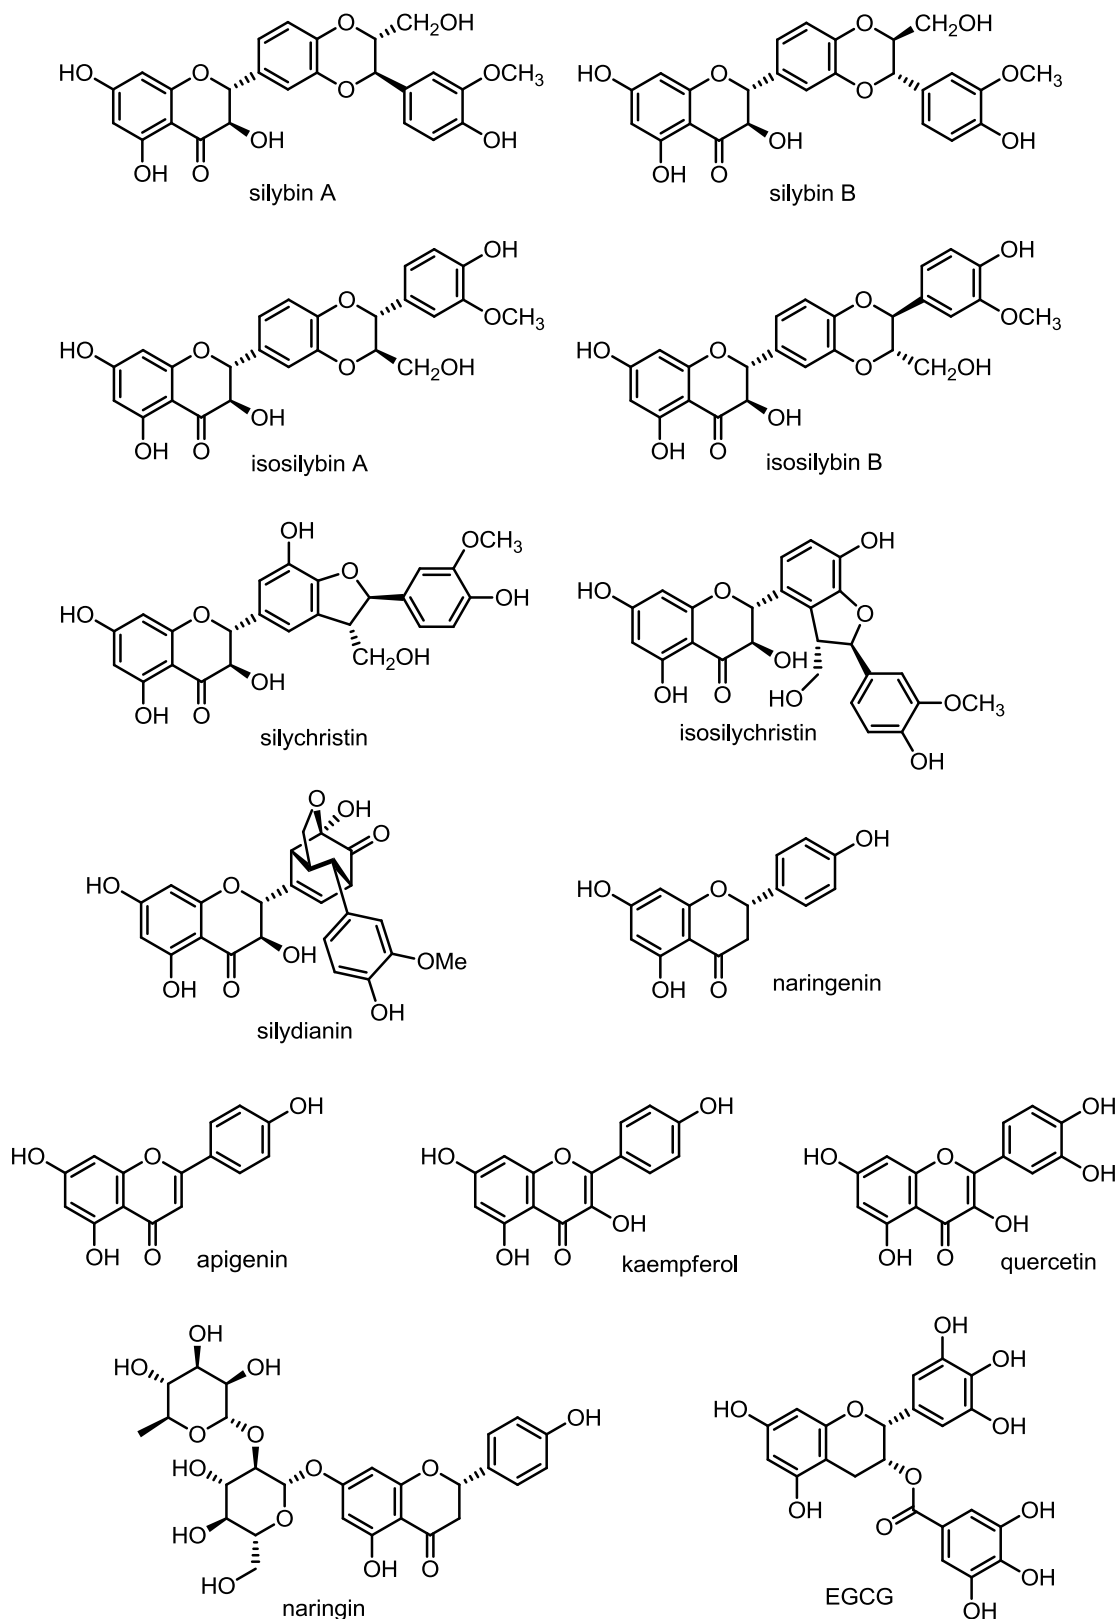**Supplemental Fig. 1.** Structures of milk thistle flavonolignans and other diet-derived constituents
